# Supplementary material for: An increase of inhibition drives the developmental decorrelation of neural activity
Source: eLife. 2022 Aug 17;11:e78811. doi: 10.7554/eLife.78811 (PMC9448324; doi:10.7554/eLife.78811)
Supplement: Supplementary file 1. [file elife-78811-supp1.xlsx]

## Sheet: Figure 1
Figure 1
B: time in active periods
		Model
term	estimate	std.error	statistic	p.value	2.5 %	97.5 %
(Intercept)	-8.16607	0.182371	-44.7772	0	-8.5294	-7.81438
age	0.884091	0.0207024	42.7048	0	0.8441	0.925268
C: firing rate
		Model
effect	group	term	estimate	std.error	statistic	p.value	2.5 %	97.5 %
fixed		(Intercept)	-2.91854	0.226051	-12.9109	3.90461e-38	-3.36159	-2.47549
fixed		age	0.206861	0.0297696	6.94873	3.6858e-12	0.148513	0.265208
ran_pars	mouse	sd__(Intercept)	0.804139
ran_pars	Residual	sd__Observation	1.20132
E: 1/f exponent
		Model
term	estimate	std.error	statistic	p.value	2.5 %	97.5 %
(Intercept)	0.150642	0.0682646	2.20673	0.0289164	0.0157115	0.285572
age	0.124307	0.00909613	13.6659	8.73789e-28	0.106327	0.142286

## Sheet: Figure 3
Figure 3
B-C: STTC
		Model
effect	group	term	estimate	std.error	statistic	df	p.value	2.5 %	97.5 %
fixed		(Intercept)	1.24735	0.0875669	14.2445	84.0559	3.97961e-24	1.07569	1.41862
fixed		age	-0.212106	0.0508936	-4.16764	81.3759	7.62787e-05	-0.311678	-0.112348
fixed		distance	-0.3262	0.0172616	-18.8975	40887.2	2.60946e-79	-0.360057	-0.292391
fixed		age:distance	0.0634288	0.0087677	7.23438	40882.1	4.75868e-13	0.046255	0.0806244
ran_pars	mouse	sd__(Intercept)	0.239576
ran_pars	Residual	sd__Observation	0.426236

## Sheet: Figure 4
Figure 4
C: proportion of inhibited units
		Model
effect	group	term	estimate	std.error	statistic	p.value	2.5 %	97.5 %
fixed		(Intercept)	-3.90969	0.982212	-3.9805	6.87708e-05	-6.07187	-1.95853
fixed		age	0.309712	0.11115	2.78644	0.00532904	0.085399	0.551507
ran_pars	mouse	sd__(Intercept)	0.868574

## Sheet: Figure 5
Figure 5
C: proportion of inhibited units
		Model
effect	group	term	estimate	std.error	statistic	p.value	2.5 %	97.5 %
fixed		(Intercept)	-4.52293	0.723262	-6.25351	4.01336e-10	-6.10338	-3.16764
fixed		age	0.543055	0.0906537	5.99043	2.09289e-09	0.370253	0.739183
ran_pars	mouse	sd__(Intercept)	1.35207

## Sheet: Figure 6
Figure 6
A-C: STTC - pre vs stim
		Model
effect	group	term	estimate	std.error	statistic	df	p.value	2.5 %	97.5 %
fixed		(Intercept)	0.301845	0.0616586	4.89542	17.8169	0.000119813	0.17793	0.425479
fixed		condChR2Stim	-0.254868	0.0141116	-18.0609	20323	2.38267e-72	-0.282526	-0.227211
fixed		distanceChR2	-0.20444	0.0087172	-23.4524	20325.3	4.89245e-120	-0.221532	-0.187361
fixed		condChR2Stim:distanceChR2	0.0463316	0.0123701	3.74544	20323	0.000180576	0.0220864	0.0705752
ran_pars	mouseChR2	sd__(Intercept)	0.263839
ran_pars	Residual	sd__Observation	0.441059
	Sum Sq	Mean Sq	NumDF	DenDF	F value	Pr(>F)
condChR2	63.456	63.456	1	20323	326.197	2.38267e-72
distanceChR2	164.862	164.862	1	20327.6	847.477	1.41836e-182
condChR2:distanceChR2	2.72897	2.72897	1	20323	14.0283	0.000180576
B-D: STTC - pre vs stim
		Model
effect	group	term	estimate	std.error	statistic	df	p.value	2.5 %	97.5 %
fixed		(Intercept)	0.0143168	0.0471962	0.303347	32.8918	0.763536	-0.0791081	0.108358
fixed		condArchTStim	0.487671	0.0132256	36.8734	18510.7	2.79776e-287	0.46175	0.513592
fixed		distanceArchT	-0.121478	0.00866838	-14.0139	18519.9	2.16048e-44	-0.138469	-0.10449
fixed		condArchTStim:distanceArchT	-0.0547426	0.0119275	-4.58961	18510.2	4.46999e-06	-0.0781232	-0.0313692
ran_pars	mouseArchT	sd__(Intercept)	0.27706
ran_pars	Residual	sd__Observation	0.406032
	Sum Sq	Mean Sq	NumDF	DenDF	F value	Pr(>F)
condArchT	224.154	224.154	1	18510.7	1359.65	2.79776e-287
distanceArchT	96.2836	96.2836	1	18528.4	584.025	4.60207e-127
condArchT:distanceArchT	3.47274	3.47274	1	18510.2	21.0645	4.46999e-06

## Sheet: Figure 7
Figure 7
B-C-D-E: STTC - controls vs GE
		Model
effect	group	term	estimate	std.error	statistic	df	p.value	2.5 %	97.5 %
fixed		(Intercept)	-0.275958	0.29837	-0.924886	60.9227	0.358674	-0.850453	0.298707
fixed		conditionWT	0.770969	0.398691	1.93375	59.7007	0.0578889	0.00318648	1.53865
fixed		age	0.0251679	0.0388048	0.648576	59.6417	0.519102	-0.0495653	0.099884
fixed		layerboth_sup	0.0128471	0.0264637	0.485464	29793.2	0.627351	-0.0391398	0.0645857
fixed		layerone_sup	-0.28051	0.0216005	-12.9863	29880.4	1.85981e-38	-0.322902	-0.238235
fixed		conditionWT:age	-0.0752069	0.052234	-1.43981	58.7709	0.155227	-0.175782	0.0253793
fixed		conditionWT:layerboth_sup	0.199886	0.0331432	6.03098	29833.1	1.64888e-09	0.134983	0.264881
fixed		conditionWT:layerone_sup	0.103558	0.0274652	3.77051	29877.8	0.000163231	0.0497692	0.157423
ran_pars	mouse	sd__(Intercept)	0.402146
ran_pars	Residual	sd__Observation	0.912044
	Sum Sq	Mean Sq	NumDF	DenDF	F value	Pr(>F)
condition	3.99304	3.99304	1	59.313	4.80034	0.0323948
age	0.18859	0.18859	1	58.7709	0.226719	0.635733
layer	587.028	293.514	2	29858.8	352.855	3.46539e-152
condition:age	1.72441	1.72441	1	58.7709	2.07305	0.155227
condition:layer	30.3059	15.1529	2	29858.8	18.2165	1.24024e-08
condition	layer	emmean	SE	df	asymp.LCL	asymp.UCL
GE	both_deep	-0.0721303	0.0801223	#NUM!	-0.229167	0.0849066
WT	both_deep	0.0897584	0.0770771	#NUM!	-0.06131	0.240827
GE	both_sup	-0.0592831	0.0805512	#NUM!	-0.217161	0.0985944
WT	both_sup	0.302491	0.077073	#NUM!	0.151431	0.453551
GE	one_sup	-0.352641	0.0794301	#NUM!	-0.508321	-0.196961
WT	one_sup	-0.0871941	0.0765497	#NUM!	-0.237229	0.0628405
contrast	layer	estimate	SE	df	z.ratio	p.value
GE - WT	both_deep	-0.161889	0.111178	#NUM!	-1.45613	0.145358
GE - WT	both_sup	-0.361774	0.111484	#NUM!	-3.24507	0.00117422
GE - WT	one_sup	-0.265446	0.110313	#NUM!	-2.4063	0.0161151
condition	age.trend	SE	df	asymp.LCL	asymp.UCL
GE	0.0251679	0.0388048	#NUM!	-0.0508881	0.101224
WT	-0.050039	0.0349653	#NUM!	-0.11857	0.0184918
contrast	estimate	SE	df	z.ratio	p.value
GE - WT	0.0752069	0.052234	#NUM!	1.43981	0.149921
F-G: STTC - controls vs ES
		Model
effect	group	term	estimate	std.error	statistic	df	p.value	2.5 %	97.5 %
fixed		(Intercept)	0.891507	0.126394	7.0534	19.0213	1.02509e-06	0.644637	1.13821
fixed		conditionES	-0.153472	0.183021	-0.838549	18.963	0.412168	-0.510769	0.203984
fixed		taggedone tagged	0.228821	0.00960812	23.8154	28546.2	3.7706e-124	0.209968	0.247629
fixed		taggedboth tagged	0.522719	0.0158205	33.0406	28550.9	5.68121e-235	0.491662	0.553674
fixed		distance	-0.240469	0.00679028	-35.4137	28534.1	7.01502e-269	-0.253777	-0.227161
fixed		conditionES:taggedone tagged	-0.155799	0.0124844	-12.4794	28545.1	1.19772e-35	-0.180247	-0.131313
fixed		conditionES:taggedboth tagged	-0.242445	0.0211399	-11.4686	28548	2.21047e-30	-0.283833	-0.200972
fixed		conditionES:distance	-0.0190566	0.00892783	-2.13451	28533.7	0.0328092	-0.0365541	-0.00156016
ran_pars	mouse	sd__(Intercept)	0.418173
ran_pars	Residual	sd__Observation	0.367296
	Sum Sq	Mean Sq	NumDF	DenDF	F value	Pr(>F)
condition	0.329818	0.329818	1	18.9767	2.44479	0.134438
tagged	211.993	105.997	2	28542.9	785.706	0
distance	423.127	423.127	1	28533.7	3136.45	0
condition:tagged	28.5992	14.2996	2	28542.9	105.997	1.36879e-46
condition:distance	0.614653	0.614653	1	28533.7	4.55615	0.0328092
condition	tagged	emmean	SE	df	asymp.LCL	asymp.UCL
controls	both untagged	0.723637	0.126316	#NUM!	0.476063	0.971211
ES	both untagged	0.556861	0.132311	#NUM!	0.297538	0.816185
controls	one tagged	0.952458	0.126423	#NUM!	0.704673	1.20024
ES	one tagged	0.629884	0.132411	#NUM!	0.370363	0.889404
controls	both tagged	1.24636	0.126973	#NUM!	0.997494	1.49522
ES	both tagged	0.837135	0.132881	#NUM!	0.576693	1.09758
contrast	tagged	estimate	SE	df	z.ratio	p.value
controls - ES	both untagged	0.166775	0.182925	#NUM!	0.911713	0.36192
controls - ES	one tagged	0.322574	0.183072	#NUM!	1.76201	0.0780683
controls - ES	both tagged	0.409221	0.183792	#NUM!	2.22654	0.0259779

## Sheet: Figure 8
Figure 8
C: 1/F exponent (dataset 1)
		Model
term	estimate	std.error	statistic	p.value	2.5 %	97.5 %
(Intercept)	-10.3066	0.291366	-35.3734	4.69974e-184	-10.8783	-9.73492
age	0.255012	0.00719118	35.4618	1.0824e-184	0.240902	0.269122
D: 1/F exponent (dataset 2)
		Model
effect	group	term	estimate	std.error	statistic	df	p.value	2.5 %	97.5 %
fixed		(Intercept)	-12.4067	2.6253	-4.72583	35.6843	3.52299e-05	-17.6206	-7.20586
fixed		age	0.298604	0.0630472	4.7362	35.4283	3.46401e-05	0.173627	0.423782
ran_pars	subj	sd__(Intercept)	0.427249
ran_pars	Residual	sd__Observation	0.791168
E: 1/F exponent (datasets comparison)
		Model
effect	group	term	estimate	std.error	statistic	df	p.value	2.5 %	97.5 %
fixed		(Intercept)	-2.13267	0.137205	-15.5437	1177.43	1.06787e-49	-2.40135	-1.86399
fixed		age	0.116801	0.00338633	34.4918	1177.43	9.27646e-181	0.110169	0.123432
fixed		dataset2	-1.41762	0.988977	-1.43342	140.397	0.153961	-3.36554	0.527591
fixed		age:dataset2	0.029801	0.023769	1.25377	139.137	0.212026	-0.0169631	0.076608
ran_pars	subj	sd__(Intercept)	0.126889
ran_pars	Residual	sd__Observation	0.296408

## Sheet: Supp. Figure 1
Supp. Figure 1
B: duration of active periods
		Model
term	estimate	std.error	statistic	p.value	2.5 %	97.5 %
(Intercept)	-0.864297	0.0591101	-14.6218	2.96532e-30	-0.979074	-0.748265
age	0.120511	0.00787631	15.3004	5.47715e-32	0.105141	0.135882
D: amplitude of active periods
		Model
term	estimate	std.error	statistic	p.value	2.5 %	97.5 %
(Intercept)	3.944	0.260721	15.1273	4.04778e-29	3.49009	4.41505
age	0.241462	0.0348164	6.9353	2.52125e-10	0.181256	0.303115
E: 1-40 Hz LFP power
		Model
term	estimate	std.error	statistic	p.value	2.5 %	97.5 %
(Intercept)	1.54483	0.270147	5.71848	8.63814e-08	1.04521	2.06922
age	0.470304	0.0360751	13.0368	2.09229e-24	0.402494	0.538668

## Sheet: Supp. Figure 3
Supp. Figure 3
B: activated units over age
		Model
effect	group	term	estimate	std.error	statistic	p.value	2.5 %	97.5 %
fixed		(Intercept)	-3.82074	0.819157	-4.66423	3.0977e-06	-5.68745	-2.22704
fixed		age	0.140774	0.0905386	1.55485	0.119982	-0.0444779	0.341832
ran_pars	mouse	sd__(Intercept)	0.537137
C: positive neurons over age
		Model
effect	group	term	estimate	std.error	statistic	df	p.value	2.5 %	97.5 %
fixed		(Intercept)	23.9769	8.14871	2.94242	14.4776	0.0103977	8.09525	39.8632
fixed		age	-1.35883	0.954594	-1.42347	14.4063	0.175896	-3.22058	0.501402
ran_pars	mouse	sd__(Intercept)	6.9347
ran_pars	Residual	sd__Observation	4.56702

## Sheet: Supp. Figure 4
Supp. Figure 4
B: Modulated units (control)
Point Estimate	Lower	Upper
0.0158	0.0073	0.034

[truncated: 2 more sheets: Supp. Figure 5, Supp. Figure 6]
